# Supplementary material
Source: Springer Nature journal article supplement (https://www.springermedizin.de/resource/supplementary/12936_2013_2875_MOESM2_ESM.pdf/9544456)

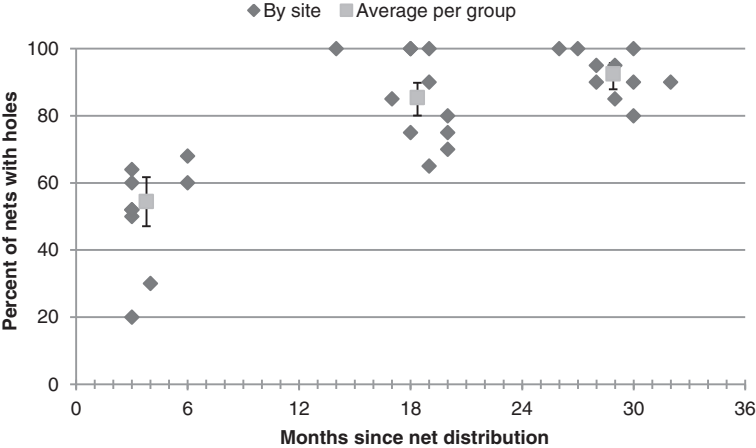

Supplement: MOESM2 [file 9544456]
